# Supplementary material for: Regulatory Effect of Light and Rhizobial Inoculation on the Root Architecture and Plant Performance of Pasture Legumes
Source: MDPI journal article supplement (doi:10.3390/agronomy13082058), 2023-08-03
Supplement: s1 [file s1]

## Article

# Regulatory Effect of Light and Rhizobial Inoculation on the Root Architecture and Plant Performance of Pasture Legumes

Irene Ariadna De Lara-Del Rey \* and María A. Pérez-Fernández

Department of Physical, Chemical and Natural Systems, University Pablo de Olavide, 41701 Seville, Spain; maperfer@upo.es

\* Correspondence: iadedel@alu.upo.es

**Table S1.** Comparison by pairs with the Kruskal–Wallis test for the number of nodules, nodule biomass, average root area, and fractal index.

| Comparisons by pairs using Kruskal–Wallis test for number of nodules   |        |       |               |
|------------------------------------------------------------------------|--------|-------|---------------|
| Species Treatment                                                      | SE     | Sig.  | Sig. adjusted |
| <i>V. sativa</i> LR Inoculated- <i>V. sativa</i> HR Inoculated         | 6,518  | 0,000 | 0,000         |
| <i>V. sativa</i> LR Inoculated- <i>V. sativa</i> IR Inoculated         | 6,518  | 0,000 | 0,000         |
| <i>V. sativa</i> IR Inoculated- <i>V. sativa</i> HR Inoculated         | 6,518  | 0,000 | 0,000         |
| <i>T. repens</i> HR Inoculated- <i>T. repens</i> LR Inoculated         | 6,518  | 0,000 | 0,000         |
| <i>T. repens</i> IR Inoculated- <i>T. repens</i> LR Inoculated         | 6,518  | 0,000 | 0,000         |
| <i>O. compressus</i> LR Inoculated- <i>O. compressus</i> HR Inoculated | 6,518  | 0,000 | 0,000         |
| <i>O. compressus</i> LR Inoculated- <i>O. compressus</i> IR Inoculated | 6,518  | 0,000 | 0,000         |
| <i>O. compressus</i> IR Inoculated- <i>O. compressus</i> HR Inoculated | 6,518  | 0,000 | 0,000         |
| <i>C. juncea</i> HR Inoculated- <i>C. juncea</i> LR Inoculated         | 6,518  | 0,000 | 0,000         |
| <i>C. juncea</i> IR Inoculated- <i>C. juncea</i> LR Inoculated         | 6,518  | 0,000 | 0,000         |
| Comparisons by pairs using Kruskal–Wallis test for nodules biomass.    |        |       |               |
| Species Treatment                                                      | SE     | Sig.  | Sig. adjusted |
| <i>V. sativa</i> LR Inoculated- <i>V. sativa</i> IR Inoculated         | 6,508  | 0,000 | 0,018         |
| <i>V. sativa</i> LR Inoculated- <i>V. sativa</i> HR Inoculated         | 6,508  | 0,000 | 0,001         |
| <i>V. sativa</i> IR Inoculated- <i>V. sativa</i> HR Inoculated         | 6,508  | 0,000 | 0,000         |
| <i>T. repens</i> HR Inoculated- <i>T. repens</i> LR Inoculated         | 6,508  | 0,000 | 0,000         |
| <i>T. repens</i> IR Inoculated- <i>T. repens</i> LR Inoculated         | 6,508  | 0,000 | 0,000         |
| <i>T. repens</i> IR Inoculated- <i>T. repens</i> HR Inoculated         | 6,508  | 0,000 | 0,000         |
| <i>O. compressus</i> LR Inoculated- <i>O. compressus</i> IR Inoculated | 6,508  | 0,000 | 0,000         |
| <i>O. compressus</i> IR Inoculated- <i>O. compressus</i> HR Inoculated | 6,508  | 0,000 | 0,000         |
| <i>C. juncea</i> HR Inoculated- <i>C. juncea</i> LR Inoculated         | 6,508  | 0,000 | 0,000         |
| <i>C. juncea</i> IR Inoculated- <i>C. juncea</i> LR Inoculated         | 6,508  | 0,000 | 0,000         |
| Comparisons by pairs using Kruskal–Wallis test for average root area   |        |       |               |
| Species Treatment                                                      | SE     | Sig.  | Sig. adjusted |
| <i>C. juncea</i> IR Control- <i>C. juncea</i> IR Inoculated            | 14,259 | 0,000 | 0,000         |
| <i>O. compressus</i> IR Control- <i>O. compressus</i> IR Inoculated    | 14,259 | 0,000 | 0,000         |
| <i>O. compressus</i> LR Control- <i>O. compressus</i> LR Inoculated    | 14,259 | 0,000 | 0,000         |
| <i>T. repens</i> HR Control- <i>T. repens</i> HR Inoculated            | 14,259 | 0,000 | 0,000         |
| <i>T. repens</i> IR Control- <i>T. repens</i> IR Inoculated            | 14,259 | 0,000 | 0,000         |
| <i>V. sativa</i> HR Control- <i>V. sativa</i> HR Inoculated            | 14,259 | 0,000 | 0,000         |
| <i>V. sativa</i> IR Control- <i>V. sativa</i> IR Inoculated            | 14,259 | 0,000 | 0,000         |
| <i>C. juncea</i> LR Control- <i>O. compressus</i> IR Inoculated        | 14,259 | 0,000 | 0,032         |
| <i>C. juncea</i> LR Control- <i>V. sativa</i> HR Inoculated            | 14,259 | 0,000 | 0,024         |

| Comparisons by pairs using Kruskal-Wallis test for fractal index.   |        |       |              |
|---------------------------------------------------------------------|--------|-------|--------------|
| Species Treatment                                                   | SE     | Sig.  | Sig adjusted |
| <i>C. juncea</i> IR Control- <i>C. juncea</i> IR Inoculated         | 14,259 | 0,000 | 0,000        |
| <i>O. compressus</i> HR Control- <i>O. compressus</i> HR Inoculated | 14,259 | 0,000 | 0,000        |
| <i>O. compressus</i> IR Control- <i>O. compressus</i> IR Inoculated | 14,259 | 0,000 | 0,000        |
| <i>O. compressus</i> LR Control- <i>O. compressus</i> LR Inoculated | 14,259 | 0,000 | 0,000        |
| <i>T. repens</i> HR Control- <i>T. repens</i> HR Inoculated         | 14,259 | 0,000 | 0,000        |
| <i>T. repens</i> IR Control- <i>T. repens</i> IR Inoculated         | 14,259 | 0,000 | 0,000        |
| <i>T. repens</i> LR Control- <i>T. repens</i> LR Inoculated         | 14,259 | 0,000 | 0,000        |
| <i>V. sativa</i> HR Control- <i>V. sativa</i> HR Inoculated         | 14,259 | 0,000 | 0,000        |
| <i>V. sativa</i> IR Control- <i>V. sativa</i> IR Inoculated         | 14,259 | 0,000 | 0,000        |
| <i>V. sativa</i> LR Control- <i>V. sativa</i> LR Inoculated         | 14,259 | 0,000 | 0,000        |
| <i>V. sativa</i> HR Inoculated- <i>T. repens</i> LR Control         | 14,259 | 0,000 | 0,042        |
| <i>O. compressus</i> IR Inoculated- <i>T. repens</i> LR Control     | 14,259 | 0,000 | 0,046        |

**Table S2.** Comparison by pairs with the Kruskal–Wallis test for relative growth rate (RGR) and below-ground allocation (BGR).

| Comparisons by pairs using Kruskal-Wallis' test for relative growth rate. |        |       |              |
|---------------------------------------------------------------------------|--------|-------|--------------|
| Species Treatment                                                         | SE     | Sig.  | Sig adjusted |
| <i>C. juncea</i> HR Inoculated - <i>C. juncea</i> HR Control              | 25,884 | 0,000 | 0,000        |
| <i>C. juncea</i> HR Control- <i>C. juncea</i> LR Control                  | 25,884 | 0,000 | 0,000        |
| <i>C. juncea</i> HR Control- <i>C. juncea</i> LR Inoculated               | 25,884 | 0,000 | 0,000        |
| <i>T. repens</i> LR Inoculated- <i>C. juncea</i> HR Control               | 25,884 | 0,000 | 0,047        |
| <i>T. repens</i> LR Inoculated— <i>V. sativa</i> HR Control               | 25,884 | 0,000 | 0,005        |
| <i>T. repens</i> LR Inoculated— <i>V. sativa</i> LR Control               | 25,884 | 0,000 | 0,003        |
| <i>T. repens</i> LR Inoculated— <i>O. compressus</i> IR Control           | 25,884 | 0,000 | 0,002        |
| <i>T. repens</i> LR Inoculated— <i>V. sativa</i> IR Control               | 25,884 | 0,000 | 0,000        |
| <i>T. repens</i> LR Inoculated— <i>V. sativa</i> HR Inoculated            | 25,884 | 0,000 | 0,000        |
| <i>T. repens</i> LR Inoculated— <i>T. repens</i> HR Inoculated            | 25,884 | 0,000 | 0,000        |
| <i>T. repens</i> LR Inoculated— <i>T. repens</i> IR Inoculated            | 25,884 | 0,000 | 0,000        |
| <i>T. repens</i> LR Inoculated— <i>V. sativa</i> IR Inoculated            | 25,884 | 0,000 | 0,000        |
| <i>T. repens</i> LR Inoculated— <i>O. compressus</i> IR Inoculated        | 25,884 | 0,000 | 0,000        |
| <i>O. compressus</i> HR Control— <i>V. sativa</i> HR Control              | 25,884 | 0,000 | 0,022        |
| <i>O. compressus</i> HR Control— <i>V. sativa</i> LR Control              | 25,884 | 0,000 | 0,013        |
| <i>O. compressus</i> HR Control— <i>O. compressus</i> IR Control          | 25,884 | 0,000 | 0,010        |
| <i>O. compressus</i> IR Control- <i>O. compressus</i> LR Control          | 25,884 | 0,000 | 0,000        |
| <i>O. compressus</i> IR Control- <i>O. compressus</i> IR Inoculated       | 25,884 | 0,000 | 0,000        |
| <i>O. compressus</i> HR Control— <i>V. sativa</i> IR Control              | 25,884 | 0,000 | 0,000        |
| <i>O. compressus</i> HR Control— <i>V. sativa</i> HR Inoculated           | 25,884 | 0,000 | 0,000        |
| <i>O. compressus</i> HR Control— <i>T. repens</i> HR Inoculated           | 25,884 | 0,000 | 0,000        |
| <i>O. compressus</i> HR Control— <i>T. repens</i> IR Inoculated           | 25,884 | 0,000 | 0,000        |
| <i>O. compressus</i> HR Control— <i>V. sativa</i> IR Inoculated           | 25,884 | 0,000 | 0,000        |
| <i>O. compressus</i> HR Control— <i>O. compressus</i> IR Inoculated       | 25,884 | 0,000 | 0,000        |
| <i>T. repens</i> LR Control- <i>V. sativa</i> IR Control                  | 25,884 | 0,000 | 0,001        |
| <i>T. repens</i> LR Control— <i>V. sativa</i> HR Inoculated               | 25,884 | 0,000 | 0,000        |
| <i>T. repens</i> LR Control— <i>T. repens</i> HR Inoculated               | 25,884 | 0,000 | 0,000        |
| <i>T. repens</i> LR Control— <i>T. repens</i> IR Inoculated               | 25,884 | 0,000 | 0,000        |
| <i>T. repens</i> LR Control— <i>V. sativa</i> IR Inoculated               | 25,884 | 0,000 | 0,000        |
| <i>T. repens</i> LR Control— <i>O. compressus</i> IR Inoculated           | 25,884 | 0,000 | 0,000        |

|                                                                        |        |       |       |
|------------------------------------------------------------------------|--------|-------|-------|
| <i>O. compressus</i> HR Inoculated— <i>V. sativa</i> IR Control        | 25,884 | 0,000 | 0,001 |
| <i>O. compressus</i> HR Inoculated— <i>V. sativa</i> HR Inoculated     | 25,884 | 0,000 | 0,001 |
| <i>O. compressus</i> HR Inoculated— <i>T. repens</i> HR Inoculated     | 25,884 | 0,000 | 0,000 |
| <i>O. compressus</i> HR Inoculated— <i>T. repens</i> IR Inoculated     | 25,884 | 0,000 | 0,000 |
| <i>O. compressus</i> HR Inoculated— <i>V. sativa</i> IR Inoculated     | 25,884 | 0,000 | 0,000 |
| <i>O. compressus</i> HR Inoculated— <i>O. compressus</i> IR Inoculated | 25,884 | 0,000 | 0,000 |
| <i>T. repens</i> HR Control— <i>V. sativa</i> IR Control               | 25,884 | 0,000 | 0,005 |
| <i>T. repens</i> HR Control— <i>V. sativa</i> HR Inoculated            | 25,884 | 0,000 | 0,002 |
| <i>T. repens</i> HR Control— <i>T. repens</i> HR Inoculated            | 25,884 | 0,000 | 0,001 |
| <i>T. repens</i> IR Control— <i>T. repens</i> IR Inoculated            | 25,884 | 0,000 | 0,000 |
| <i>T. repens</i> HR Control— <i>T. repens</i> IR Inoculated            | 25,884 | 0,000 | 0,000 |
| <i>T. repens</i> HR Control— <i>V. sativa</i> IR Inoculated            | 25,884 | 0,000 | 0,000 |
| <i>T. repens</i> HR Control— <i>O. compressus</i> IR Inoculated        | 25,884 | 0,000 | 0,000 |
| <i>C. juncea</i> HR Inoculated— <i>T. repens</i> IR Inoculated         | 25,884 | 0,000 | 0,016 |
| <i>C. juncea</i> HR Inoculated— <i>V. sativa</i> IR Inoculated         | 25,884 | 0,000 | 0,014 |
| <i>C. juncea</i> HR Inoculated— <i>O. compressus</i> IR Inoculated     | 25,884 | 0,000 | 0,002 |
| <i>C. juncea</i> IR Inoculated— <i>T. repens</i> IR Inoculated         | 25,884 | 0,000 | 0,043 |
| <i>C. juncea</i> IR Inoculated— <i>V. sativa</i> IR Inoculated         | 25,884 | 0,000 | 0,037 |
| <i>C. juncea</i> IR Inoculated— <i>O. compressus</i> IR Inoculated     | 25,884 | 0,000 | 0,007 |
| <i>C. juncea</i> IR Control— <i>O. compressus</i> IR Inoculated        | 25,884 | 0,000 | 0,037 |
| <i>V. sativa</i> HR Control— <i>V. sativa</i> HR Inoculated            | 25,884 | 0,000 | 0,000 |
| <i>V. sativa</i> IR Control— <i>V. sativa</i> IR Inoculated            | 25,884 | 0,000 | 0,000 |

**Comparisons by pairs using Kruskal-Wallis' test for below ground allocation**

| Species Treatment                                                      | SE     | Sig.  | Sig adjusted |
|------------------------------------------------------------------------|--------|-------|--------------|
| <i>T. repens</i> LR Control— <i>V. sativa</i> LR Control               | 25,884 | 0,000 | 0,006        |
| <i>T. repens</i> LR Control— <i>O. compressus</i> IR Control           | 25,884 | 0,000 | 0,001        |
| <i>T. repens</i> LR Control— <i>V. sativa</i> HR Control               | 25,884 | 0,000 | 0,001        |
| <i>T. repens</i> LR Control— <i>V. sativa</i> HR Inoculated            | 25,884 | 0,000 | 0,000        |
| <i>T. repens</i> LR Control— <i>T. repens</i> HR Inoculated            | 25,884 | 0,000 | 0,000        |
| <i>T. repens</i> LR Control— <i>V. sativa</i> IR Control               | 25,884 | 0,000 | 0,000        |
| <i>T. repens</i> LR Control— <i>V. sativa</i> IR Inoculated            | 25,884 | 0,000 | 0,000        |
| <i>T. repens</i> LR Control— <i>T. repens</i> IR Inoculated            | 25,884 | 0,000 | 0,000        |
| <i>T. repens</i> LR Control— <i>O. compressus</i> IR Inoculated        | 25,884 | 0,000 | 0,000        |
| <i>O. compressus</i> HR Control— <i>V. sativa</i> LR Control           | 25,884 | 0,000 | 0,022        |
| <i>O. compressus</i> HR Control— <i>O. compressus</i> IR Control       | 25,884 | 0,000 | 0,006        |
| <i>O. compressus</i> HR Control— <i>V. sativa</i> HR Control           | 25,884 | 0,000 | 0,003        |
| <i>O. compressus</i> HR Control— <i>V. sativa</i> HR Inoculated        | 25,884 | 0,000 | 0,000        |
| <i>O. compressus</i> HR Control— <i>T. repens</i> HR Inoculated        | 25,884 | 0,000 | 0,000        |
| <i>O. compressus</i> HR Control— <i>V. sativa</i> IR Control           | 25,884 | 0,000 | 0,000        |
| <i>O. compressus</i> HR Control— <i>V. sativa</i> IR Inoculated        | 25,884 | 0,000 | 0,000        |
| <i>O. compressus</i> HR Control— <i>T. repens</i> IR Inoculated        | 25,884 | 0,000 | 0,000        |
| <i>O. compressus</i> IR Control— <i>O. compressus</i> IR Inoculated    | 25,884 | 0,000 | 0,000        |
| <i>O. compressus</i> IR Control— <i>O. compressus</i> HR Inoculated    | 25,884 | 0,000 | 0,000        |
| <i>O. compressus</i> HR Control— <i>O. compressus</i> IR Inoculated    | 25,884 | 0,000 | 0,000        |
| <i>O. compressus</i> IR Inoculated— <i>O. compressus</i> LR Inoculated | 25,884 | 0,000 | 0,000        |
| <i>T. repens</i> LR Inoculated— <i>V. sativa</i> LR Control            | 25,884 | 0,000 | 0,028        |
| <i>T. repens</i> LR Inoculated— <i>O. compressus</i> IR Control        | 25,884 | 0,000 | 0,008        |
| <i>T. repens</i> LR Inoculated— <i>V. sativa</i> HR Control            | 25,884 | 0,000 | 0,003        |
| <i>T. repens</i> LR Inoculated— <i>V. sativa</i> HR Inoculated         | 25,884 | 0,000 | 0,000        |

|                                                                     |        |       |       |
|---------------------------------------------------------------------|--------|-------|-------|
| <i>T. repens</i> LR Inoculated — <i>T. repens</i> HR Inoculated     | 25,884 | 0,000 | 0,000 |
| <i>T. repens</i> LR Inoculated — <i>V. sativa</i> IR Control        | 25,884 | 0,000 | 0,000 |
| <i>T. repens</i> LR Inoculated — <i>T. repens</i> IR Inoculated     | 25,884 | 0,000 | 0,000 |
| <i>T. repens</i> LR Inoculated — <i>O. compressus</i> IR Inoculated | 25,884 | 0,000 | 0,000 |
| <i>V. sativa</i> HR Inoculated- <i>V. sativa</i> HR Control         | 25,884 | 0,000 | 0,000 |
| <i>V. sativa</i> HR Inoculated- <i>V. sativa</i> LR Control         | 25,884 | 0,000 | 0,000 |
| <i>V. sativa</i> HR Inoculated- <i>V. sativa</i> LR Inoculated      | 25,884 | 0,000 | 0,000 |
| <i>V. sativa</i> IR Inoculated- <i>V. sativa</i> LR Inoculated      | 25,884 | 0,000 | 0,000 |
